# Supplementary material for: Influence of hidden halogen mobility on local structure of CsSn(Cl1−xBrx)3 mixed-halide perovskites by solid-state NMR
Source: Royal Society of Chemistry journal article supplement (doi:10.1039/d0sc05614f), 2020-12-30
Supplement: d0sc05614f1.pdf [file d0sc05614f1.pdf]

## *Electronic Supplementary Information (ESI)*

### **Influence of Hidden Halogen Mobility on Local Structure of CsSn(Cl<sub>1-x</sub>Br<sub>x</sub>)<sub>3</sub> Mixed-Halide Perovskites by Solid-State NMR**

Abhoy Karmakar, Amit Bhattacharya, Diganta Sarkar, Guy M. Bernard, Arthur Mar and Vladimir K. Michaelis\*

*Department of Chemistry, University of Alberta, Edmonton, Alberta T6G 2G2, Canada*

*\*Corresponding Author: vladimir.michaelis@ualberta.ca*

| Table of Contents                                                                                                                                                                                                                                                                                                                                                                                                                                                           |  | Page(s) |
|-----------------------------------------------------------------------------------------------------------------------------------------------------------------------------------------------------------------------------------------------------------------------------------------------------------------------------------------------------------------------------------------------------------------------------------------------------------------------------|--|---------|
| Experimental                                                                                                                                                                                                                                                                                                                                                                                                                                                                |  | S3-S5   |
| <b>Table S1.</b> Elemental analysis of CsSn(Cl <sub>1-x</sub> Br <sub>x</sub> ) <sub>3</sub> materials measured by EDS.                                                                                                                                                                                                                                                                                                                                                     |  | S5      |
| <b>Table S2.</b> Unit cell constants (a) and direct bandgap values for CsSn(Cl <sub>1-x</sub> Br <sub>x</sub> ) <sub>3</sub> materials.                                                                                                                                                                                                                                                                                                                                     |  | S5      |
| <b>Table S3.</b> Room temperature solid-state <sup>133</sup> Cs NMR experimental parameters, chemical shifts, fwhm and spin-lattice relaxation ( <i>T</i> <sub>1</sub> ) values for CsSn(Cl <sub>1-x</sub> Br <sub>x</sub> ) <sub>3</sub> materials.                                                                                                                                                                                                                        |  | S6      |
| <b>Table S4.</b> Room temperature solid-state <sup>119</sup> Sn NMR experimental parameters, chemical shifts, fwhm and spin-lattice relaxation ( <i>T</i> <sub>1</sub> ) values for CsSn(Cl <sub>1-x</sub> Br <sub>x</sub> ) <sub>3</sub> materials.                                                                                                                                                                                                                        |  | S6      |
| <b>Table S5.</b> Room temperature solid-state <sup>119</sup> Sn NMR experimental parameters ( <i>B</i> <sub>0</sub> = 11.75 T), chemical shifts, fwhm and spin-lattice relaxation ( <i>T</i> <sub>1</sub> ) for CsSnBr <sub>3</sub> materials prepared by the solvent synthesis (SS), high temperature (HT) and mechanochemical synthesis (MCS) methods.                                                                                                                    |  | S7      |
| <b>Table S6.</b> Variable temperature <sup>119</sup> Sn NMR parameters for CsSnBr <sub>3</sub> (SS) at 11.75 T acquired under non-spinning sample conditions.                                                                                                                                                                                                                                                                                                               |  | S7      |
| Supplementary note 1                                                                                                                                                                                                                                                                                                                                                                                                                                                        |  | S7      |
| <b>Table S7.</b> Solid-state <sup>133</sup> Cs NMR acquisition parameters and experimental conditions used for the CsSnBr <sub>3</sub> areal degradation study.                                                                                                                                                                                                                                                                                                             |  | S8      |
| <b>Table S8.</b> Solid-state <sup>119</sup> Sn NMR acquisition parameters and experimental conditions used for the CsSnBr <sub>3</sub> areal degradation study.                                                                                                                                                                                                                                                                                                             |  | S8      |
| <b>Figure S1.</b> Room temperature solid-state <sup>133</sup> Cs NMR spectra of CsSn(Cl <sub>1-x</sub> Br <sub>x</sub> ) <sub>3</sub> materials at 11.75 T with a magic-angle spinning frequency of 13 kHz.                                                                                                                                                                                                                                                                 |  | S9      |
| <b>Figure S2.</b> Room temperature PXRD (a) and <sup>133</sup> Cs NMR spectra (b) of CsSnCl <sub>3</sub> materials prepared by the high-temperature sealed-tube method followed by slow-cooling (5 K/min). PXRD patterns were collected within 24 h of synthesis and <sup>133</sup> Cs NMR were acquired at 11.75 T after six days of synthesis. Plot of <sup>133</sup> Cs NMR peak area for the cubic CsSnCl <sub>3</sub> phase as a function of time (up to 72 days) (c). |  | S9      |
| <b>Figure S3.</b> FESEM image and the corresponding EDS elemental mapping for Cs, Sn, Cl and Br for the CsSn(Cl <sub>1-x</sub> Br <sub>x</sub> ) <sub>3</sub> materials.                                                                                                                                                                                                                                                                                                    |  | S10     |
| <b>Figure S4.</b> Room temperature experimental and fitted PXRD diagram for the CsSn(Cl <sub>1-x</sub> Br <sub>x</sub> ) <sub>3</sub> series. All the diffraction data are fitted to a cubic (Pm-3m) space group symmetry.                                                                                                                                                                                                                                                  |  | S11     |
| <b>Figure S5.</b> Tauc plots showing direct bandgaps of the cubic phases of CsSn(Cl <sub>1-x</sub> Br <sub>x</sub> ) <sub>3</sub> materials.                                                                                                                                                                                                                                                                                                                                |  | S12     |
| <b>Figure S6.</b> Solid-state <sup>119</sup> Sn NMR spectra of CsSnBr <sub>3</sub> at 7.05 and 11.75 T under non-spinning sample conditions.                                                                                                                                                                                                                                                                                                                                |  | S13     |
| <b>Figure S7.</b> Solid-state <sup>119</sup> Sn NMR spectra of c-CsSnCl <sub>3</sub> (a), CsSn(Cl <sub>0.50</sub> Br <sub>0.50</sub> ) <sub>3</sub> (b) and CsSnBr <sub>3</sub> (c) at 11.75 T acquired with spinning frequencies of 0 and 10 kHz.                                                                                                                                                                                                                          |  | S13     |
| <b>Figure S8.</b> Solid-state <sup>119</sup> Sn NMR spectra of CsSn(Cl <sub>0.10</sub> Br <sub>0.90</sub> ) <sub>3</sub> at 11.75 T acquired with spinning frequencies between 0 to 13 kHz with the Hahn-echo pulse sequence and with various echo-delays.                                                                                                                                                                                                                  |  | S14     |
| <b>Figure S9.</b> Solid-state <sup>119</sup> Sn NMR chemical shifts vs the inverse of direct bandgap values for the CsSn(Cl <sub>1-x</sub> Br <sub>x</sub> ) <sub>3</sub> series.                                                                                                                                                                                                                                                                                           |  | S14     |
| <b>Figure S10.</b> Room temperature PXRD patterns for the CsSnBr <sub>3</sub> parent material synthesized by the solvent synthesis (SS), high temperature (HT) and mechanochemical synthesis (MCS) methods.                                                                                                                                                                                                                                                                 |  | S15     |
| <b>Figure S11.</b> UV-Vis absorption spectra (a) and Tauc plots showing direct bandgaps (b-d) for the CsSnBr <sub>3</sub> parent material synthesized by the solvent synthesis (SS), high temperature (HT) and mechanochemical synthesis (MCS) methods.                                                                                                                                                                                                                     |  | S15     |
| <b>Figure S12.</b> Variable temperature (230-418 K) <sup>119</sup> Sn <i>T</i> <sub>2</sub> * relaxation time as a function of absolute temperature for the CsSnBr <sub>3</sub> (SS) material.                                                                                                                                                                                                                                                                              |  | S16     |
| <b>Figure S13.</b> UV-Vis absorption spectra for CsSnBr <sub>3</sub> that was stored under ambient laboratory conditions over 300 days, pristine CsSnBr <sub>3</sub> and Cs <sub>2</sub> SnBr <sub>6</sub> .                                                                                                                                                                                                                                                                |  | S16     |
| <b>Figure S14.</b> Solid-state <sup>119</sup> Sn NMR spectra of for degraded CsSnBr <sub>3</sub> parent and SnBr <sub>2</sub> starting precursor at 11.75 T acquired with spinning frequencies of 12 kHz with 2,000,000 scans each.                                                                                                                                                                                                                                         |  | S17     |
| <b>References</b>                                                                                                                                                                                                                                                                                                                                                                                                                                                           |  | S17     |

## EXPERIMENTAL

### Materials

Starting materials were purchased from the following commercial sources and were used without further modification: CsCl (Terochem Laboratories Ltd. 99.7%), CsBr (Sigma, 99.99%), SnCl<sub>2</sub> (Alfa Aesar, >99%), SnBr<sub>2</sub> (Alfa Aesar, 99.2%), SnBr<sub>4</sub> (Sigma, 99%), HBr (Anachemia, 48%), and H<sub>3</sub>PO<sub>2</sub> (Sigma, 50 wt.% in H<sub>2</sub>O).

**High-Temperature Synthesis of CsSn(Cl<sub>1-x</sub>Br<sub>x</sub>)<sub>3</sub> (0 ≤ x ≤ 1):** Various members of the solid solution CsSn(Cl<sub>1-x</sub>Br<sub>x</sub>)<sub>3</sub> were prepared by reactions at high temperature. CsX and SnX<sub>2</sub> (X = Cl, Br) were combined in stoichiometric ratios on a 0.5-g scale, finely ground using an agate mortar and pestle, pressed into pellets, and loaded into fused-silica tubes which were evacuated under a pressure of 10<sup>-3</sup> mbar and sealed. The tubes were heated at 1.5 K/min to either 673 or 723 K (depending on composition), held at that temperature for 15 h, and then cooled to room temperature at 5 K/min. The samples were stored in glass vials and further characterized under ambient conditions.

Cubic CsSnCl<sub>3</sub> was obtained as a metastable phase at room temperature as follows: a sample of CsSnCl<sub>3</sub> prepared as described above was heated to 673 K, kept at this temperature for 15 h, cooled to 573 K at 5 K/min, and then quenched in an ice-water bath.

**Mechanochemical Synthesis of CsSnBr<sub>3</sub>:** A mixture of 1.5 mmol each of CsBr and SnBr<sub>2</sub> was ground using an agate mortar and pestle for 10 min. Within an argon-filled glove box, the mixture was transferred to a 50-mL zirconia grinding vessel (containing ca. 50 g of zirconia balls with 3–8 mm diameter), which was sealed with parafilm to minimize exposure to air. The sample was ground in a Changsha Deco DECO-PBM-V-0.4L electric planetary ball mill at a rotation frequency of 550 rpm for 0.5 h. The vessel was opened to scratch its inner wall by using a clean spatula and sealed again under an inert atmosphere (Ar glove box). This process was repeated four times for a total of 2.5 h of grinding time.

**Solvent Synthesis of CsSnBr<sub>3</sub>:** A mixture of 1 mmol each of CsBr and SnBr<sub>2</sub> was placed in a 40-mL glass vial to which 4.5 mL of concentrated HBr and 0.5 mL of H<sub>3</sub>PO<sub>2</sub> were added. The mixture was heated under a nitrogen atmosphere to 120 °C on a hot plate, with continuous stirring by a magnetic stir bar. A black precipitate formed immediately. After the mixture was heated for 0.5 h, it was cooled over 1 h to room temperature. The precipitate was filtered under reduced pressure, washed with isopropyl alcohol, dried for 0.5 h, and quickly packed into a 4-mm o.d. ZrO<sub>2</sub> rotor for the solid-state NMR experiments.

**Solvent Synthesis of Cs<sub>2</sub>SnBr<sub>6</sub>:** A mixture of CsBr (2 mmol) and SnBr<sub>4</sub> (1 mmol) was placed in a 10-mL glass vial to which 5 mL of concentrated HBr was added. The mixture was heated to 120 °C on a hot plate, with continuous stirring by a magnetic stir bar. A white precipitate formed immediately. After the mixture was heated for 1 h, it was cooled over 1 h to room temperature. The precipitate was filtered using a Buchner funnel, washed with 95% ethanol, dried overnight, and stored in a vial under ambient conditions.

**Powder X-ray Diffraction:** Powder XRD patterns were collected on a Rigaku Ultima IV diffractometer equipped with a Co  $K\alpha$  radiation source ( $K_{\alpha 1}$ , 1.78900 Å;  $K_{\alpha 2}$ , 1.79283 Å) operated at 38 kV and 38 mA, and a D/Tex Ultra detector with a Fe filter to eliminate  $K_{\beta}$  radiation (1.62083 Å). The samples were placed on zero background plates. Data were collected in continuous scan mode between 5 and 90° in  $2\theta$  with a step size of 0.0200°. Profile fitting was performed using the FullProf suite of software and unit cell parameters were refined.

**Energy-dispersive X-ray Spectroscopy and Field Emission Scanning Electron Microscopy:** Samples were examined on Zeiss Sigma 300 VP field emission scanning electron microscope equipped with dual silicon drift detectors for energy-dispersive X-ray spectroscopy to determine chemical compositions.

**UV-Visible Diffuse Reflectance Spectroscopy:** Diffuse reflectance spectra were collected on a Cary 5000 UV-vis-NIR spectrophotometer between 200 and 800 nm and calibrated with a Spectralon (>99%) reflectance standard. The diffuse reflectance spectra were converted to absorption spectra using the Kubelka-Munk function,  $\alpha/S = (1-R)^2/2R$ , where  $\alpha$  is the Kubelka-Munk absorption coefficient,  $S$  is the scattering coefficient, and  $R$  is the reflectance. Direct bandgaps were extrapolated from the intercepts in Tauc plots of  $(\alpha h\nu)^2$  vs  $E$  (eV).

**Solid-State Nuclear Magnetic Resonance (NMR) Spectroscopy:**

*I. Cesium-133 NMR Spectroscopy:* Solid-state  $^{133}\text{Cs}$  NMR measurements were performed at 11.75 T ( $^1\text{H}$ , 500 MHz) on a Bruker Avance NEO 500 spectrometer, under magic angle spinning (MAS) conditions using a 4 mm H/X MAS Bruker probe with  $\omega_0/2\pi(^{133}\text{Cs}) = 65.6$  MHz. All samples were packed into 4 mm o.d.  $\text{ZrO}_2$  rotors and NMR data were acquired using a Bloch decay pulse sequence using a short tip angle pulse of 1.38  $\mu\text{s}$  ( $\pi/2$  pulse = 5.5  $\mu\text{s}$ , solution  $\gamma B_1/2\pi = 45.5$  kHz) with an acquisition time of 100 ms and an optimized recycle delay of 10 to 1800 s. The nuclear spin-lattice relaxation time ( $T_1$ ) values of  $^{133}\text{Cs}$  nuclei for all samples were measured using an inversion recovery pulse sequence. The  $T_1$  values were calculated by fitting the peak intensity values using a three-parameter exponential decay function:  $I_{(t)} = I_{(\infty)} + Ae^{-t/T_1}$ , where  $I_{(t)}$  and  $I_{(\infty)}$  are the NMR signal intensities measured at time  $t$  and at  $t$  infinity, respectively, and  $T_1$  are  $A$  are the spin-lattice relaxation time and pre-exponential constant, respectively. All  $^{133}\text{Cs}$  NMR spectra discussed here were referenced by setting a 0.1 M  $\text{CsNO}_3$  (aq.) solution at  $(^{133}\text{Cs}) = 0.00$  ppm.

*II. Tin-119 NMR Spectroscopy:* Solid-state  $^{119}\text{Sn}$  NMR measurements were performed at 11.75 T ( $^1\text{H}$ , 500 MHz) on a Bruker Avance NEO 500 spectrometer under both MAS and non-spinning conditions using a 4 mm H/X MAS Bruker probe with  $\omega_0/2\pi(^{119}\text{Sn}) = 186.5$  MHz. All samples were packed into 4 mm o.d.  $\text{ZrO}_2$  rotors and NMR data were acquired using a 4.0  $\mu\text{s}$   $\pi/2$  ( $\gamma B_1/2\pi = 62.5$  kHz) either with a Hahn-echo pulse sequence  $((\pi/2)_x - \tau_1 - (\pi)_y - \tau_2 - \text{ACQ}$ , where  $\tau$  represents the interpulse and refocusing delays) or with a Bloch pulse sequence with an acquisition time of 4-5 ms and an optimized recycle delay of 0.01-200 s.

Variable temperature (VT)  $^{119}\text{Sn}$  NMR spectra were acquired between 230 and 418 K with the same instrument under non-spinning conditions using a Bruker VT unit and calibrated using the  $^{207}\text{Pb}$  chemical shifts of  $\text{MAPbCl}_3$ .<sup>2</sup> Dry  $\text{N}_2(\text{g})$  was used as the VT gas and gas flow rates were adjusted to reach the target temperatures. The  $^{119}\text{Sn}$   $T_1$  values were measured using an inversion recovery pulse sequence as discussed in the  $^{133}\text{Cs}$  NMR experimental section. All  $^{119}\text{Sn}$  NMR spectra were referenced by setting the  $^{119}\text{Sn}$  signal of a tetracyclohexyl-tin(IV) powder to  $\delta(^{119}\text{Sn}) = -97.35$  ppm, a secondary reference with respect to  $\text{Sn}(\text{CH}_3)_4$  at  $\delta(^{119}\text{Sn}) = 0.00$  ppm.

**Table S1.** Elemental analysis of  $\text{CsSn}(\text{Cl}_{1-x}\text{Br}_x)_3$  materials measured by EDS.

| Sample<br>(Nominal composition)                   | Elemental atomic % |      |      |      | %Cl : %Br |
|---------------------------------------------------|--------------------|------|------|------|-----------|
|                                                   | Cs                 | Sn   | Cl   | Br   |           |
| $\text{CsSnCl}_3$                                 | 19.3               | 19.4 | 61.3 | -    | 100 : 0   |
| $\text{CsSn}(\text{Cl}_{0.90}\text{Br}_{0.10})_3$ | 18.9               | 19.5 | 54.6 | 7.0  | 89 : 11   |
| $\text{CsSn}(\text{Cl}_{0.67}\text{Br}_{0.33})_3$ | 18.8               | 19.4 | 39.6 | 22.2 | 64 : 36   |
| $\text{CsSn}(\text{Cl}_{0.50}\text{Br}_{0.50})_3$ | 18.8               | 18.6 | 29.4 | 33.2 | 47 : 53   |
| $\text{CsSn}(\text{Cl}_{0.33}\text{Br}_{0.67})_3$ | 18.3               | 19.1 | 19.0 | 43.6 | 30 : 70   |
| $\text{CsSn}(\text{Cl}_{0.10}\text{Br}_{0.90})_3$ | 19.4               | 18.7 | 6.0  | 55.9 | 10 : 90   |
| $\text{CsSnBr}_3$                                 | 17.3               | 18.0 | -    | 64.7 | 0 : 100   |

**Table S2.** Unit cell constants (a) and direct bandgap values for  $\text{CsSn}(\text{Cl}_{1-x}\text{Br}_x)_3$  materials.

| Sample                                            | Unit cell constant, a<br>(Å) | Direct bandgap<br>(eV) |
|---------------------------------------------------|------------------------------|------------------------|
| $\text{CsSnCl}_3$ (cubic)                         | 5.5894(5)                    | 2.83                   |
| $\text{CsSn}(\text{Cl}_{0.90}\text{Br}_{0.10})_3$ | 5.6108(3)                    | 2.71                   |
| $\text{CsSn}(\text{Cl}_{0.67}\text{Br}_{0.33})_3$ | 5.6642(3)                    | 2.42                   |
| $\text{CsSn}(\text{Cl}_{0.50}\text{Br}_{0.50})_3$ | 5.6991(6)                    | 2.26                   |
| $\text{CsSn}(\text{Cl}_{0.33}\text{Br}_{0.67})_3$ | 5.7353(7)                    | 2.10                   |
| $\text{CsSn}(\text{Cl}_{0.10}\text{Br}_{0.90})_3$ | 5.7830(2)                    | 1.87                   |
| $\text{CsSnBr}_3$                                 | 5.8031(3)                    | 1.79                   |

**Table S3.** Room temperature solid-state  $^{133}\text{Cs}$  NMR experimental parameters, chemical shifts, fwhm and spin-lattice relaxation ( $T_1$ ) values for  $\text{CsSn}(\text{Cl}_{1-x}\text{Br}_x)_3$  materials. The  $^{133}\text{Cs}$  NMR spectra were acquired at 11.75 T using a Bloch pulse sequence.

| Sample                                            | $\nu_{\text{rot}}$ (kHz) | Recycle delay (s) | $^{133}\text{Cs}$ fwhm (Hz) $\pm 5$ | $\delta(^{133}\text{Cs})$ (ppm) $\pm 0.1$ | $T_1(^{133}\text{Cs})$ (s) |
|---------------------------------------------------|--------------------------|-------------------|-------------------------------------|-------------------------------------------|----------------------------|
| $\text{CsSnCl}_3$ (cubic)                         | 13.0                     | 300               | 138                                 | 64.7                                      | $14.8 \pm 0.2$             |
| $\text{CsSn}(\text{Cl}_{0.90}\text{Br}_{0.10})_3$ |                          | 60                | 92                                  | 68.6                                      | $9.8 \pm 0.2$              |
| $\text{CsSn}(\text{Cl}_{0.67}\text{Br}_{0.33})_3$ |                          | 100               | 82                                  | 73.7                                      | $15.3 \pm 0.4$             |
| $\text{CsSn}(\text{Cl}_{0.50}\text{Br}_{0.50})_3$ |                          | 60                | 114                                 | 74.7                                      | $19.7 \pm 0.1$             |
| $\text{CsSn}(\text{Cl}_{0.33}\text{Br}_{0.67})_3$ |                          | 60                | 149                                 | 73.4                                      | $25.0 \pm 0.1$             |
| $\text{CsSn}(\text{Cl}_{0.10}\text{Br}_{0.90})_3$ |                          | 60                | 125                                 | 67.7                                      | $35.3 \pm 0.1$             |
| $\text{CsSnBr}_3$                                 |                          | 60                | 70                                  | 64.0                                      | $34.9 \pm 0.1$             |

**Table S4.** Room temperature solid-state  $^{119}\text{Sn}$  NMR experimental parameters, chemical shifts, fwhm and spin-lattice relaxation ( $T_1$ ) values for  $\text{CsSn}(\text{Cl}_{1-x}\text{Br}_x)_3$  materials. The  $^{119}\text{Sn}$  NMR spectra were acquired at 11.75 T using a Hahn-echo ( $\nu_{\text{rf}} = 62.5$  kHz).

| Sample                                            | $\nu_{\text{rot}}$ (kHz) | Recycle delay (s) | $\delta(^{119}\text{Sn})$ (ppm) | $^{119}\text{Sn}$ fwhm (kHz) $\pm 0.1$ | $T_1(^{119}\text{Sn})$ (s) |
|---------------------------------------------------|--------------------------|-------------------|---------------------------------|----------------------------------------|----------------------------|
| $\text{CsSnCl}_3$ (cubic)                         | 10.0                     | 10                | $-562 \pm 1$                    | 1.8                                    | 3.5                        |
| $\text{CsSn}(\text{Cl}_{0.90}\text{Br}_{0.10})_3$ |                          | 1                 | $-544 \pm 1$                    | 1.4                                    | 3.4                        |
| $\text{CsSn}(\text{Cl}_{0.67}\text{Br}_{0.33})_3$ |                          | 1                 | $-510 \pm 1$                    | 1.7                                    | 2.4                        |
| $\text{CsSn}(\text{Cl}_{0.50}\text{Br}_{0.50})_3$ |                          | 5                 | $-487 \pm 1$                    | 2.7                                    | $3.0 \times 10^{-1}$       |
| $\text{CsSn}(\text{Cl}_{0.33}\text{Br}_{0.67})_3$ |                          | 1                 | $-458 \pm 2$                    | 4.3                                    | $2.7 \times 10^{-2}$       |
| $\text{CsSn}(\text{Cl}_{0.10}\text{Br}_{0.90})_3$ |                          | 0.01              | $-365 \pm 5$                    | 17.0                                   | $8.0 \times 10^{-3}$       |
| $\text{CsSnBr}_3$                                 |                          | 0.20              | $-289 \pm 5$                    | 19.0                                   | $5.6 \times 10^{-3}$       |

**Table S5.** Room temperature solid-state  $^{119}\text{Sn}$  NMR experimental parameters, chemical shifts, fwhm and spin-lattice relaxation ( $T_1$ ) for  $\text{CsSnBr}_3$  materials prepared by the solvent synthesis (SS), high temperature (HT) and mechanochemical synthesis (MCS) methods. The  $^{119}\text{Sn}$  NMR spectra were acquired at 11.75 T using a Hahn-echo ( $\nu_{\text{rf}} = 62.5$  kHz).

| Sample                  | $\nu_{\text{rot}}$ (kHz) | Recycle delay (s) | $\delta(^{119}\text{Sn})$ (ppm) | $^{119}\text{Sn}$ fwhm (kHz) | $T_1(^{119}\text{Sn})$ (s) |
|-------------------------|--------------------------|-------------------|---------------------------------|------------------------------|----------------------------|
| $\text{CsSnBr}_3$ (SS)  | 0.0                      | 0.05              | $-386 \pm 2$                    | $7.5 \pm 0.2$                | $0.025 \pm 0.001$          |
| $\text{CsSnBr}_3$ (HT)  |                          | 0.2               | $-284 \pm 5$                    | $21.0 \pm 0.5$               | $0.007 \pm 0.001$          |
| $\text{CsSnBr}_3$ (MCS) |                          | 0.2               | $-295 \pm 10$                   | $34.0 \pm 1.0$               | $0.003 \pm 0.001$          |

**Table S6.** Variable-temperature  $^{119}\text{Sn}$  NMR parameters for  $\text{CsSnBr}_3$  (SS) acquired under non-spinning sample conditions at 11.75 T using a  $4.0 \mu\text{s}$   $\pi/2$  Bloch pulse sequence.

| T(set) (K) | T(calibrated) ( $\pm 2$ ) (K) | $\delta_{\text{iso}}(^{119}\text{Sn})$ $\dagger$ (ppm) | $\Omega$ (ppm) $\dagger$ | $\kappa$ $\dagger$ | $^{119}\text{Sn}$ fwhm (kHz) $\pm 0.1$ | $^{119}\text{Sn}$ $T_2^*$ (ms) | $^{119}\text{Sn}$ $T_1$ (ms) |
|------------|-------------------------------|--------------------------------------------------------|--------------------------|--------------------|----------------------------------------|--------------------------------|------------------------------|
| 233        | 229.5                         | -393                                                   | 85                       | -0.1               | 14.7                                   | 0.068                          | 635(200)                     |
| 253        | 250.9                         | -393                                                   | 75                       | -0.1               | 13.6                                   | 0.074                          | 390(85)                      |
| 273        | 273.6                         | -390                                                   | 75                       | -0.25              | 10.6                                   | 0.094                          | 123(12)                      |
| 292.4      | 295.4                         | -386                                                   | 35                       | -1.0               | 7.2                                    | 0.139                          | 25(1)                        |
| 313        | 318.7                         | -371                                                   | 0                        | NA                 | 6.5                                    | 0.154                          | 14(1)                        |
| 333        | 341.5                         | -364                                                   | 0                        | NA                 | 6.1                                    | 0.164                          | 8.8(5)                       |
| 353        | 366.4                         | -350                                                   | 0                        | NA                 | 5.7                                    | 0.175                          | 4.12(15)                     |
| 373        | 385.5                         | -334                                                   | 0                        | NA                 | 6.0                                    | 0.167                          | 2.16(9)                      |
| 393        | 407.6                         | -319.6                                                 | 0                        | NA                 | 5.4                                    | 0.185                          | 1.14(5)                      |
| 403        | 417.9                         | -317.7                                                 | 0                        | NA                 | 4.5                                    | 0.222                          | 0.92(2)                      |

NA – not applicable;  $\dagger$  -  $\delta_{\text{iso}}$ ,  $\Omega$  and  $\kappa$  are isotropic chemical shift, span and skew, respectively,

$$\text{where } \delta_{\text{iso}} = \frac{\delta_{11} + \delta_{22} + \delta_{33}}{3}, \Omega = (\delta_{11} - \delta_{33}) \text{ and } \kappa = 3\left(\frac{\delta_{22} - \delta_{\text{iso}}}{\Omega}\right)$$

### Supplementary note 1:

The variable temperature  $^{119}\text{Sn}$  spin-lattice relaxation time ( $T_1$ ) is related to the absolute temperature values for  $\text{CsSnBr}_3$  (SS) as shown in Table S6.  $\log_{10}[T_1/\text{s}]$  linearly depends on  $[1000/\text{T}(\text{K})]$  (i.e., an Arrhenius relationship) within the temperature range of 230 to 418 K. The slope of the Arrhenius fit is related to the activation energy as  $E_a = (2303 \cdot \text{R}) \cdot (\text{slope})$ , where  $\text{R} = 8.314 \text{ J}/(\text{mol} \cdot \text{K})$ . A slope value of  $1.51 \pm 0.06 \text{ K}$  was obtained from the least-squares Arrhenius fit; hence  $E_a = 28.9 \pm 1.2 \text{ kJ/mol}$  or  $0.30 \pm 0.01 \text{ eV}$

**Table S7.** Solid-state  $^{133}\text{Cs}$  NMR acquisition parameters and experimental conditions used for the  $\text{CsSnBr}_3$  areal degradation study (see Figure 9b in the manuscript). The  $^{133}\text{Cs}$  NMR spectra were acquired at 11.75 T using a Bloch pulse sequence.

| Material                     | $T_1$ (s) | $\nu_{\text{rot}}$ (kHz) | Recycle delay (s) | # of scans | Acquisition time (min) |
|------------------------------|-----------|--------------------------|-------------------|------------|------------------------|
| $\text{CsSnBr}_3$ (degraded) | -         | 5 kHz                    | 1800              | 4          | 120                    |
| $\text{CsSnBr}_3$            | 34.9      |                          | 60                | 4          | 4                      |
| $\text{Cs}_2\text{SnBr}_6$   | 170       |                          | 500               | 4          | 33                     |
| CsBr                         | 631       |                          | 300               | 4          | 20                     |

**Table S8.** Solid-state  $^{119}\text{Sn}$  NMR acquisition parameters and experimental conditions used for the  $\text{CsSnBr}_3$  areal degradation study (see Figure 9c in the manuscript). The  $^{119}\text{Sn}$  NMR spectra were acquired at 11.75 T using a Hahn-echo ( $\nu_{\text{rf}} = 62.5$  kHz).

| Material                            | $T_1$ (s)              | $\nu_{\text{rot}}$ (kHz) | Recycle delay (s) | # of scans | Acquisition time (min) |      |
|-------------------------------------|------------------------|--------------------------|-------------------|------------|------------------------|------|
| $\text{CsSnBr}_3$ (degraded)        | region-1               | -                        | 0                 | 0.2        | 512                    | 1.7  |
|                                     | region-1               | -                        | 10                | 0.2        | 512                    | 1.7  |
|                                     | region-2               | -                        | 10                | 100        | 512                    | 853  |
|                                     | region-3               | -                        | 10                | 100        | 512                    | 853  |
|                                     | region-4               | -                        | 12                | 0.01       | 2,000,000              | 736  |
| $\text{CsSnBr}_3$                   | 0.006                  | 10                       | 0.2               | 1024       | 3.4                    |      |
| $\text{Cs}_2\text{SnBr}_6$          | 12.3                   | 10                       | 100               | 32         | 53                     |      |
| $\text{SnO}_2$                      | 3.1 <sup>ref.3</sup>   | 10                       | 30                | 32         | 15                     |      |
| $\text{SnBr}_4$                     | 1.95 <sup>ref.4</sup>  | 0                        | 3                 | 512        | 25.6                   |      |
| $\text{SnBr}_2$ (trace metal grade) | $\text{SnBr}_2$ region | 1.12 <sup>ref.4</sup>    | 13                | 1.5        | 512                    | 12.8 |
|                                     | $\beta$ -Sn region     | 0.00012 <sup>ref.4</sup> | 12                | 0.005      | 2,000,000              | 537  |



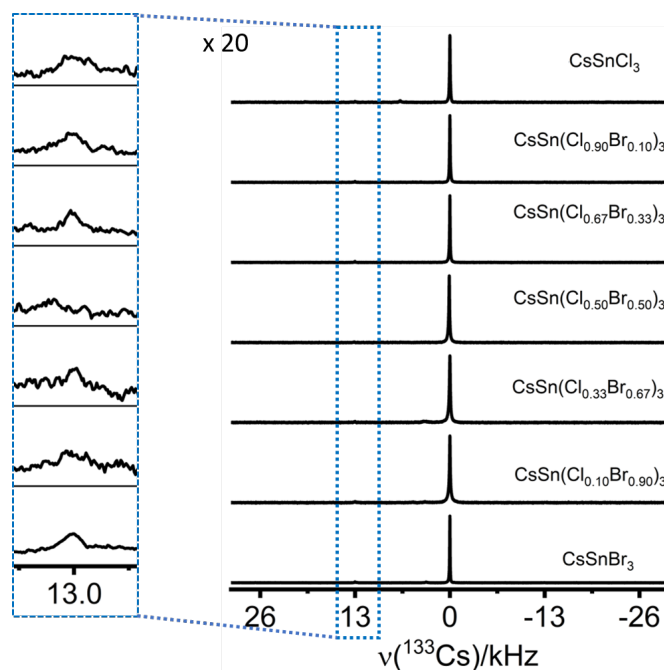

**Figure S1.** Room temperature solid-state  $^{133}\text{Cs}$  NMR spectra of  $\text{CsSn}(\text{Cl}_{1-x}\text{Br}_x)_3$  materials at 11.75 T with a magic angle spinning frequency of 13 kHz. Expansion shows the corresponding spinning side band.

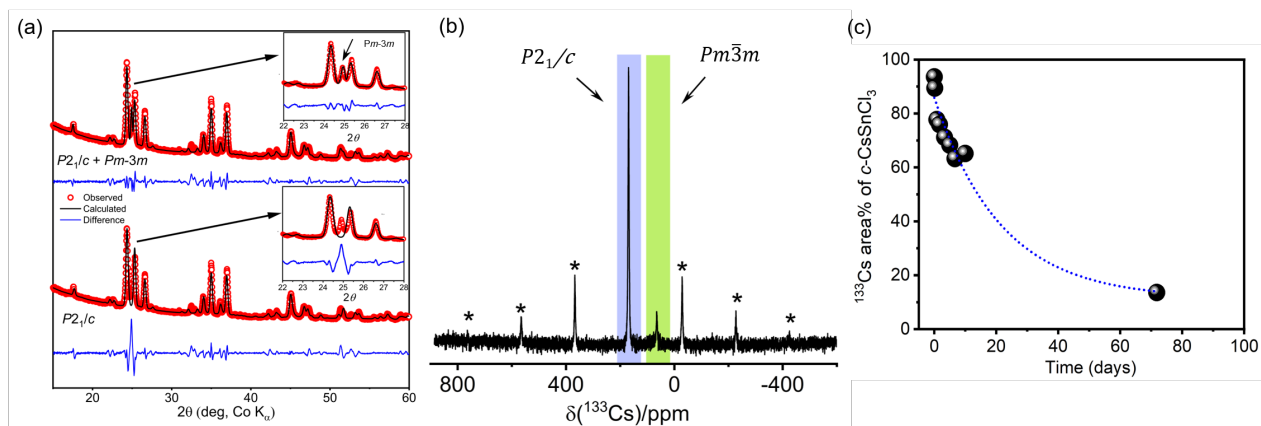

**Figure S2.** Room temperature PXRD (a) and  $^{133}\text{Cs}$  NMR spectra (b) of  $\text{CsSnCl}_3$  materials prepared by the high-temperature sealed-tube method followed by slow-cooling (5 K/min). PXRD patterns were collected within 24 h of synthesis and  $^{133}\text{Cs}$  NMR spectra were acquired at 11.75 T after six days of synthesis. The asterisks (\*) in (b) indicate spinning sidebands for monoclinic  $\text{CsSnCl}_3$ . Plot of  $^{133}\text{Cs}$  NMR peak area for the cubic  $\text{CsSnCl}_3$  phase as a function of time (up to 72 days) showing mono-exponential like decay kinetics for the cubic to monoclinic phase transition in  $\text{CsSnCl}_3$  (c). The data points between 10 to 72 days are missing because of the sudden institutional lockdown (~60 days) during the first wave of COVID-19 pandemic in early 2020.

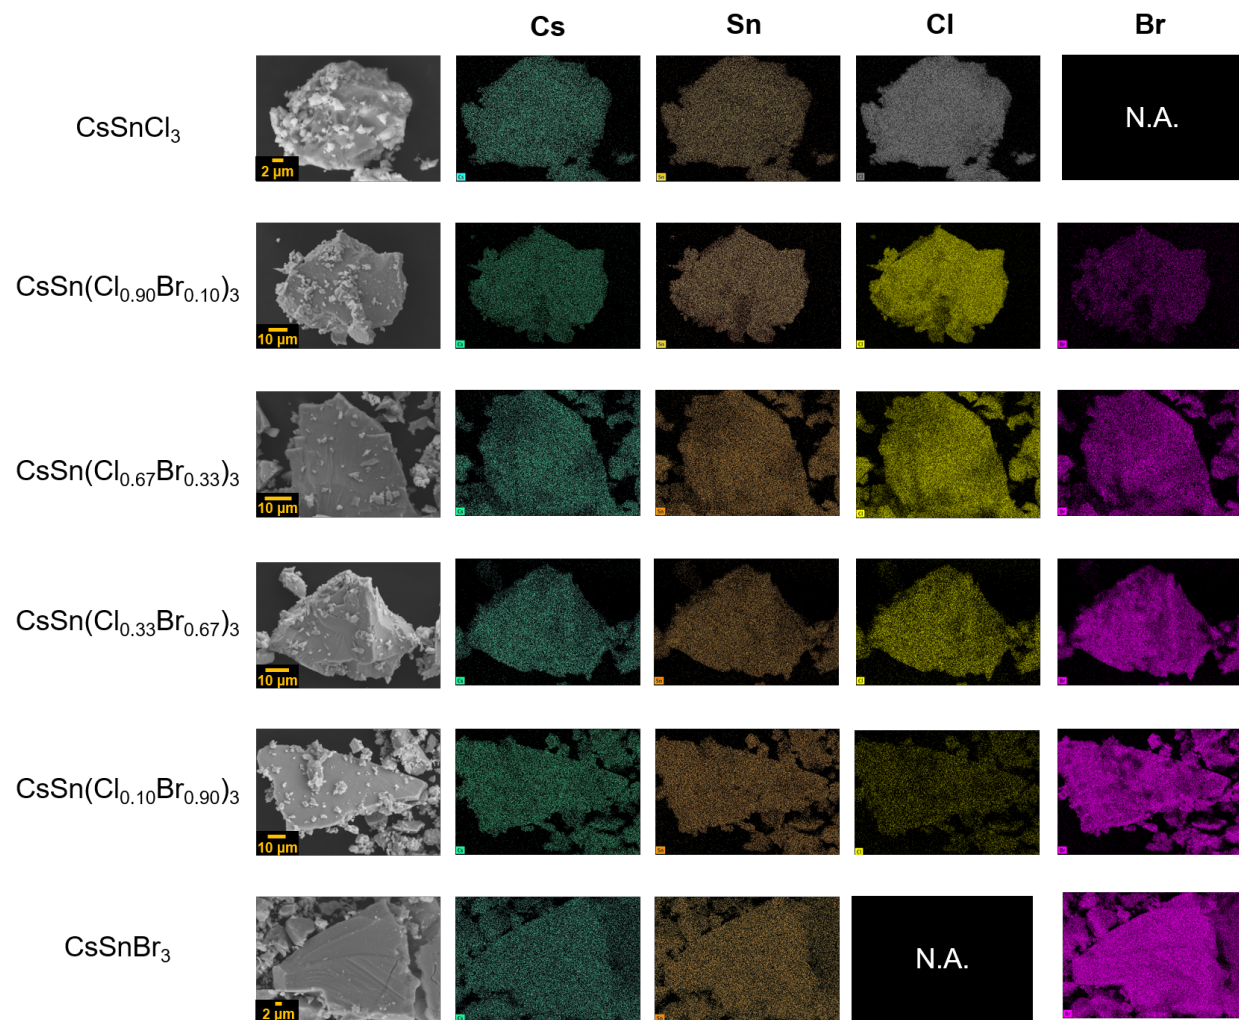

**Figure S3.** FESEM images and the corresponding EDS elemental mapping for Cs, Sn, Cl and Br for the  $\text{CsSn}(\text{Cl}_{1-x}\text{Br}_x)_3$  materials (top to bottom:  $x = 0.00, 0.10, 0.33, 0.67$  and  $1.00$ ).

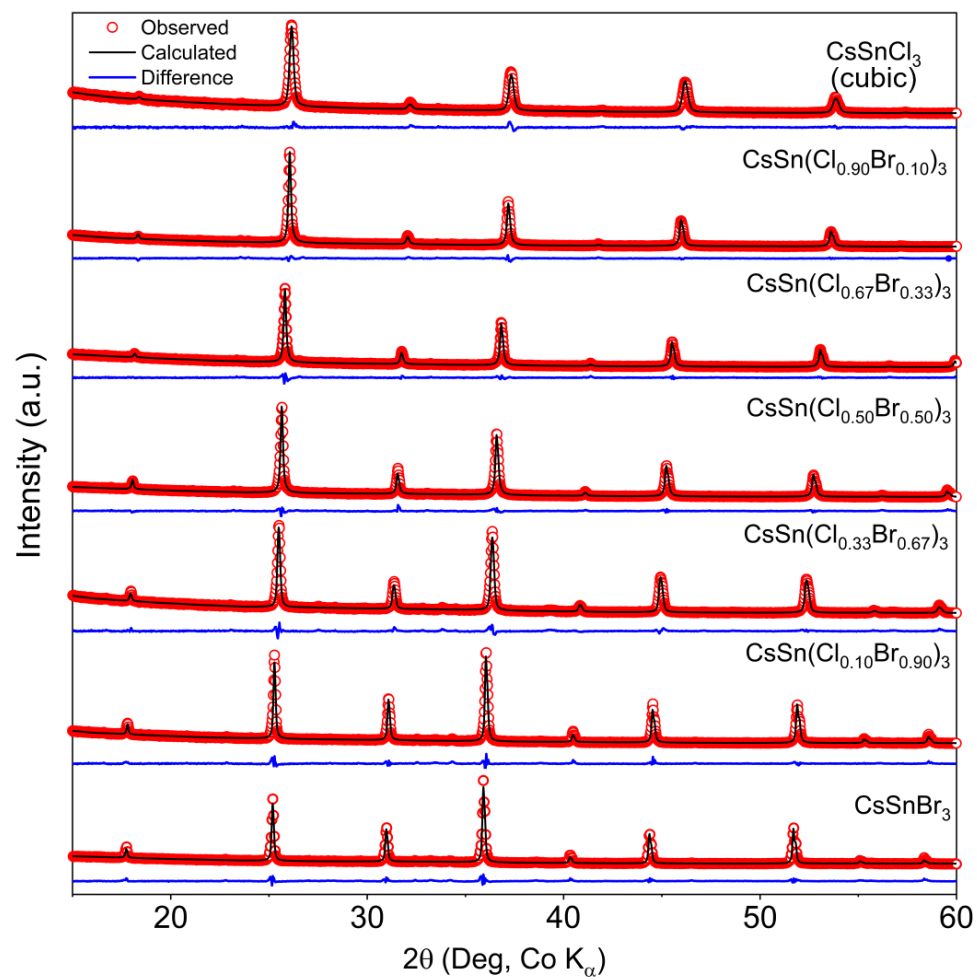

**Figure S4.** Room temperature experimental and fitted PXRD diagrams for the  $\text{CsSn}(\text{Cl}_{1-x}\text{Br}_x)_3$  series. All the diffraction data are fitted assuming a cubic ( $Pm-3m$ ) space group symmetry.

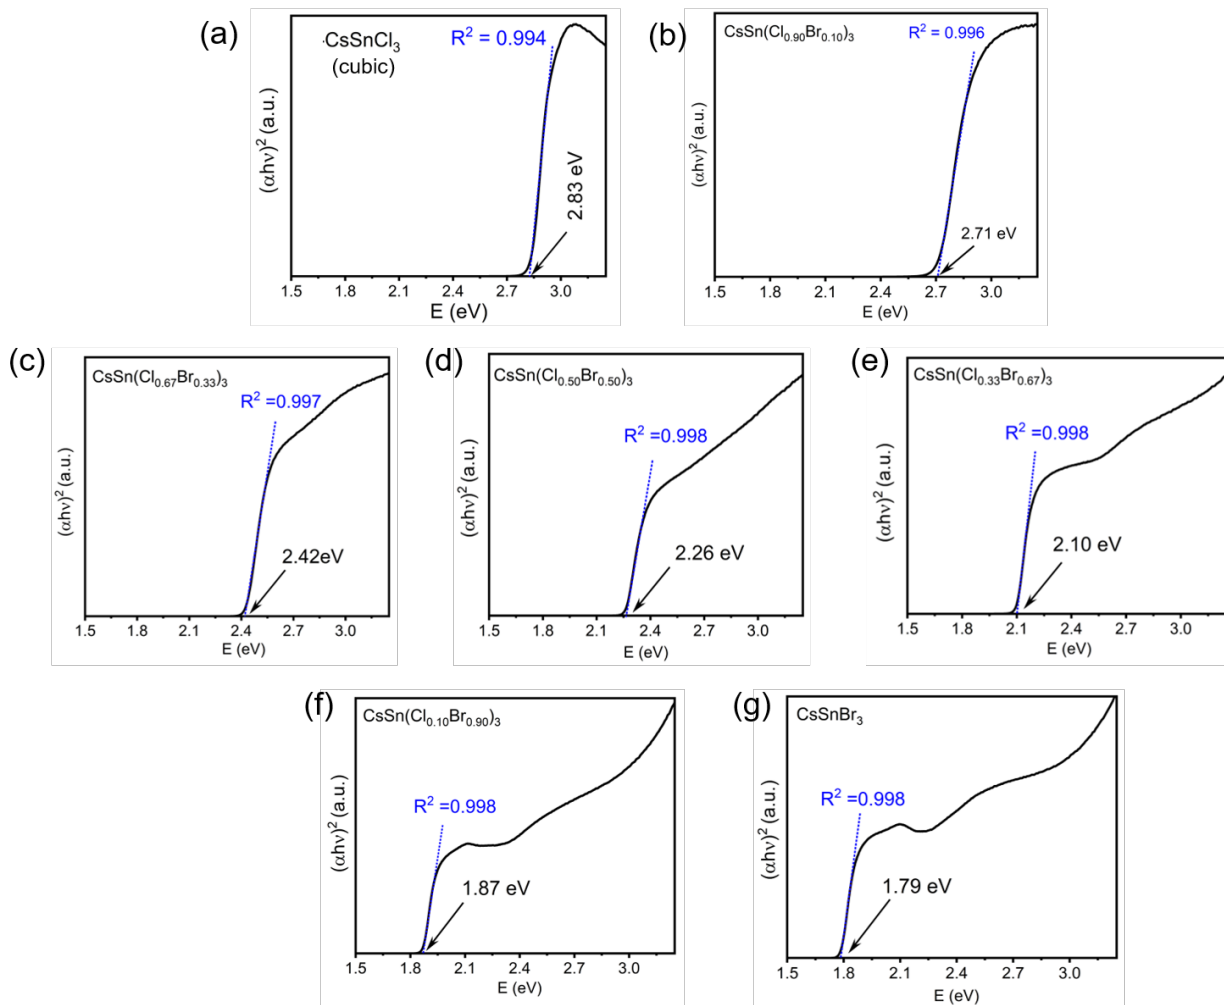

**Figure S5.** Tauc plots showing direct bandgaps of the cubic phases of  $\text{CsSn}(\text{Cl}_{1-x}\text{Br}_x)_3$  materials; *c*- $\text{CsSnCl}_3$  (a),  $\text{CsSn}(\text{Cl}_{0.90}\text{Br}_{0.10})_3$  (b),  $\text{CsSn}(\text{Cl}_{0.67}\text{Br}_{0.33})_3$  (c),  $\text{CsSn}(\text{Cl}_{0.50}\text{Br}_{0.50})_3$  (d),  $\text{CsSn}(\text{Cl}_{0.33}\text{Br}_{0.67})_3$  (e),  $\text{CsSn}(\text{Cl}_{0.10}\text{Br}_{0.90})_3$  (f) and  $\text{CsSnBr}_3$  (g).

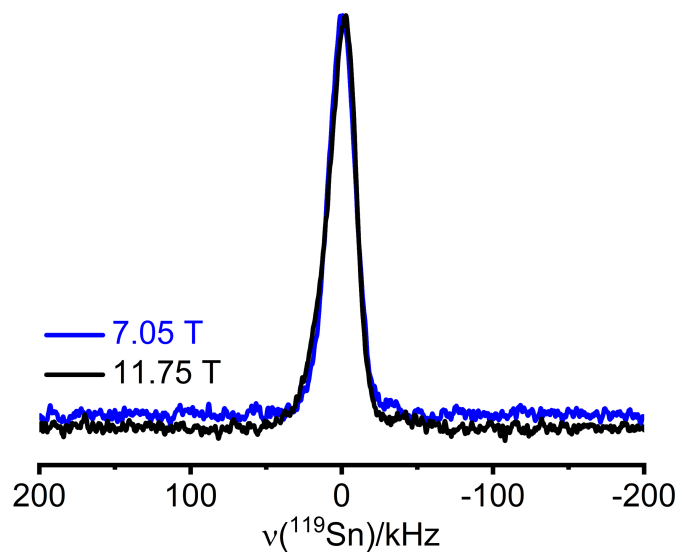

**Figure S6.** Solid-state  $^{119}\text{Sn}$  NMR spectra of  $\text{CsSnBr}_3$  at 7.05 and 11.75 T under non-spinning sample conditions. The scales are vertically normalized.

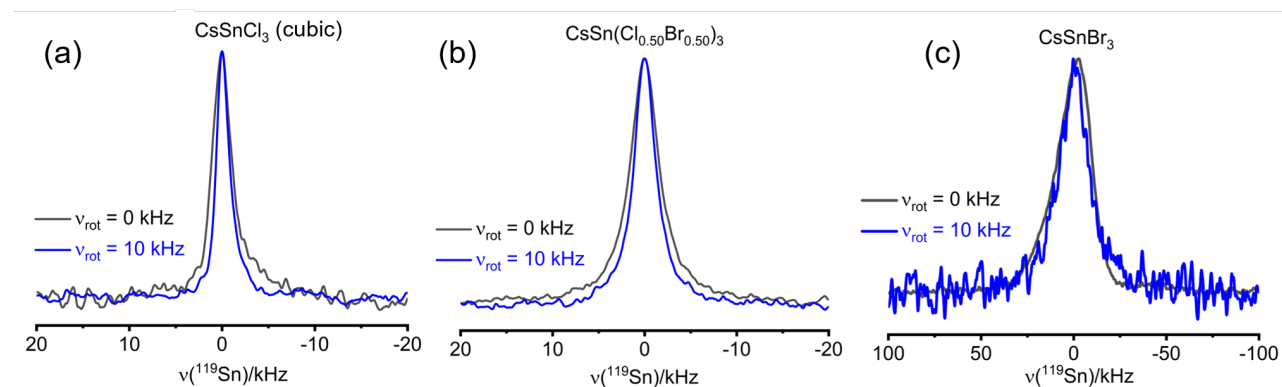

**Figure S7.** Solid-state  $^{119}\text{Sn}$  NMR spectra of *c*- $\text{CsSnCl}_3$  (a),  $\text{CsSn}(\text{Cl}_{0.50}\text{Br}_{0.50})_3$  (b) and  $\text{CsSnBr}_3$  (c) at 11.75 T acquired with spinning frequencies of 0 and 10 kHz. The scales are vertically normalized.

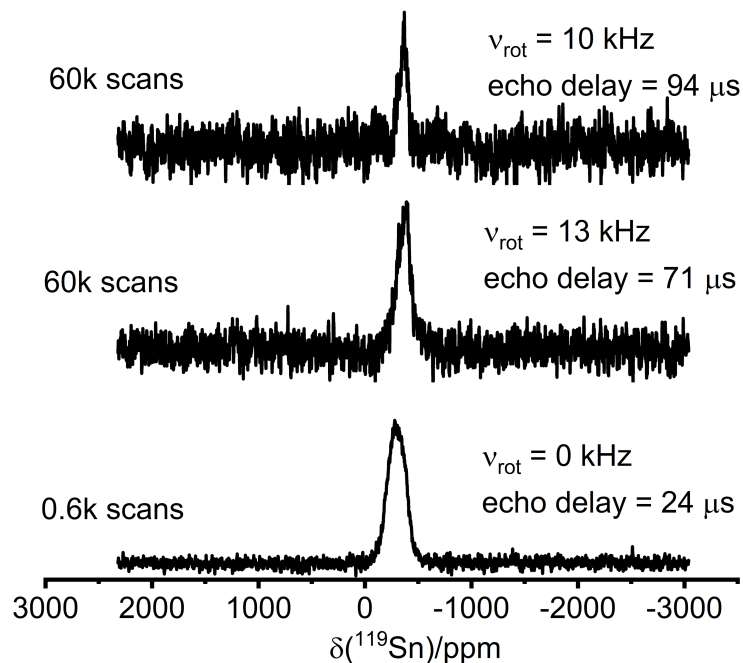

**Figure S8.** Solid-state  $^{119}\text{Sn}$  NMR spectra of  $\text{CsSn}(\text{Cl}_{0.10}\text{Br}_{0.90})_3$  at 11.75 T acquired with spinning frequencies between 0 to 13 kHz with the Hahn-echo pulse sequence and with various echo-delays as indicated. The scales are vertically normalized.

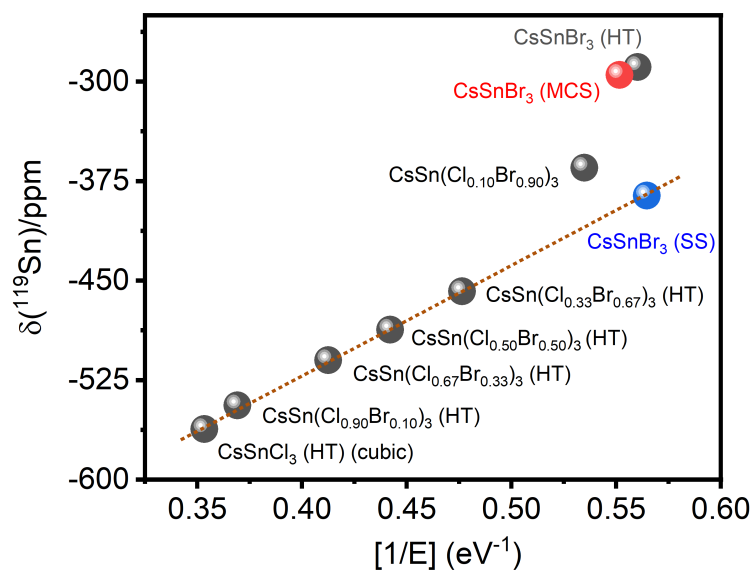

**Figure S9.** Solid-state  $^{119}\text{Sn}$  NMR chemical shifts vs the inverse of direct bandgap values for the  $\text{CsSn}(\text{Cl}_{1-x}\text{Br}_x)_3$  series.

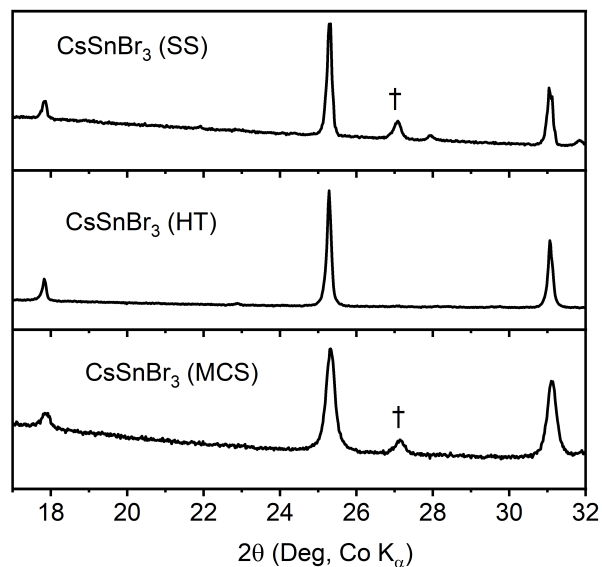

**Figure S10.** Room temperature PXRD patterns for the  $\text{CsSnBr}_3$  parent material synthesized by the solvent synthesis (SS), high temperature (HT) and mechanochemical synthesis (MCS) methods. The dagger (†) indicates signal from  $\text{Cs}_2\text{SnBr}_6$ .

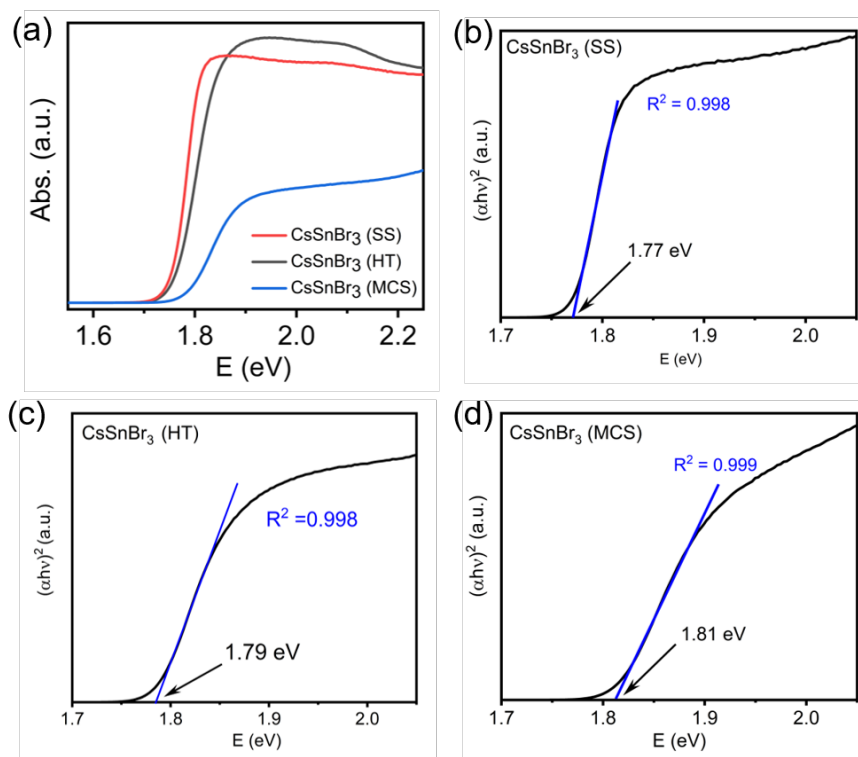

**Figure S11.** UV-Vis absorption spectra (a) and Tauc plots showing direct bandgaps (b-d) for the  $\text{CsSnBr}_3$  parent material synthesized by the solvent synthesis (SS), high temperature (HT) and mechanochemical synthesis (MCS) methods.

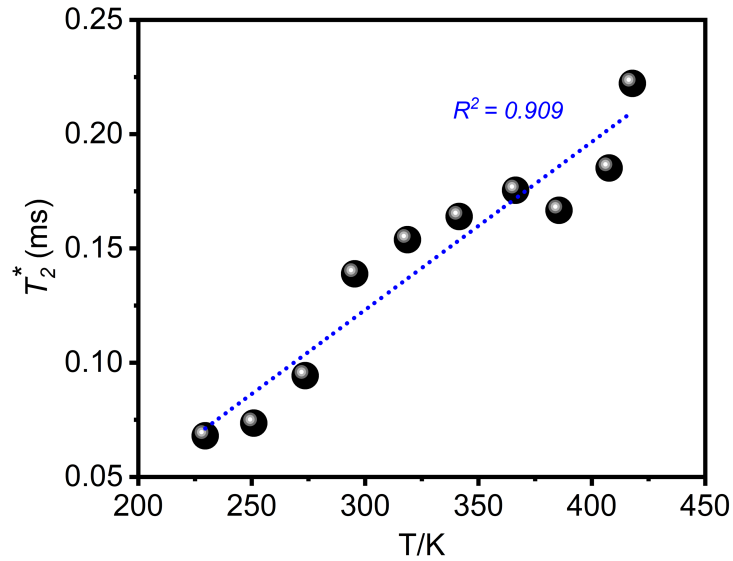

**Figure S12.**  $^{119}\text{Sn}$   $T_2^*$  (i.e.,  $\frac{1}{f_{\text{whm}}}$ ) relaxation time as a function of absolute temperature (230-418 K) for the  $\text{CsSnBr}_3$  (SS) material.  $^{119}\text{Sn}$  NMR spectra were acquired at 11.75 T under non-spinning sample conditions. The data were fit by a least-squares method with the following equation:  $T_2^*/\text{ms} = -0.09756(0.02587) + 7.35516(0.77322) \times 10^{-4} \cdot T/\text{K}$

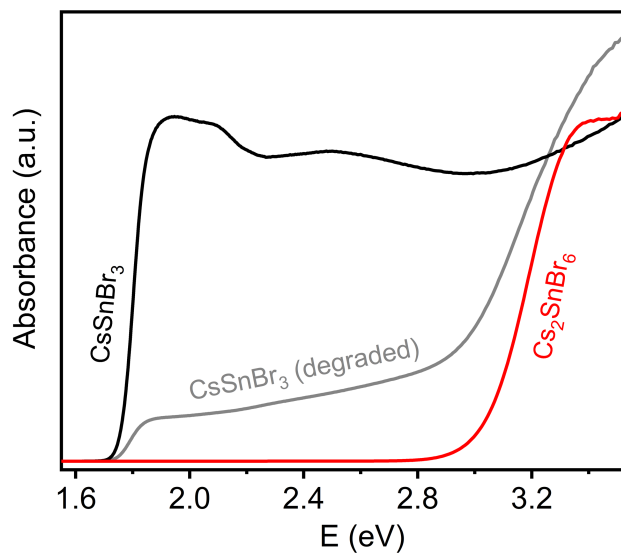

**Figure S13.** UV-Vis absorption spectra for a  $\text{CsSnBr}_3$  sample that was stored under ambient laboratory conditions over 300 days (degraded  $\text{CsSnBr}_3$ ), pristine  $\text{CsSnBr}_3$  and  $\text{Cs}_2\text{SnBr}_6$ .



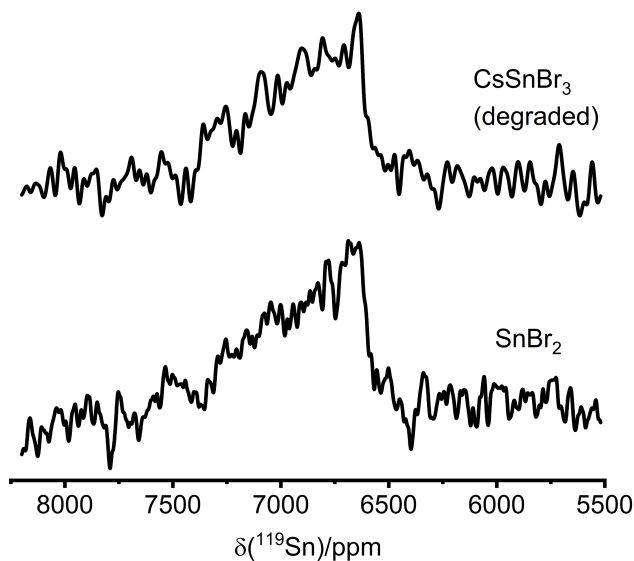

**Figure S14.** Solid-state  $^{119}\text{Sn}$  NMR spectra of the degraded  $\text{CsSnBr}_3$  parent and  $\text{SnBr}_2$  starting precursor at 11.75 T acquired with spinning frequencies of 12 kHz with 2,000,000 scans each.

#### References:

- (1) Kubelka, P.; Munk, F. Ein Beitrag Zur Optik Der Farbanstriche. *Z.Tech. Phys. (Leipzig)* **1931**, *12*, 593–601.
- (2) Bernard, G. M.; Goyal, A.; Miskolzie, M.; McKay, R.; Wu, Q.; Wasylishen, R. E.; Michaelis, V. K. Methylammonium Lead Chloride: A Sensitive Sample for an Accurate NMR Thermometer. *J. Magn. Reson.* **2017**, *283*, 14–21.
- (3) Cossement, C.; Darville, J.; Gilles, J. -M; Nagy, J. B.; Fernandez, C.; Amoureux, J. -P. Chemical Shift Anisotropy and Indirect Coupling in  $\text{SnO}_2$  and  $\text{SnO}$ . *Magn. Reson. Chem.* **1992**, *30* (3), 263–270.
- (4) Kubicki, D. J.; Prochowicz, D.; Salager, E.; Rakhmatullin, A.; Grey, C. P.; Emsley, L.; Stranks, S. D. Local Structure and Dynamics in Methylammonium, Formamidinium and Cesium Tin(II) Mixed-halide Perovskites from  $^{119}\text{Sn}$  Solid-State NMR. *J. Am. Chem. Soc.* **2020**, *142*, 7813–7826.
